# Evo-devo dynamics of human brain size

Mauricio González-Forero\*<sup>1</sup>

<sup>1</sup>School of Biology, University of St Andrews, Dyers Brae, St Andrews, KY16 9TH, Fife, UK

## Abstract

Brain size tripled in the human lineage over four million years, but why this occurred remains uncertain. To advance our understanding of what caused human-brain expansion, we mechanistically replicate it in-silico by modelling the evolutionary and developmental (evo-devo) dynamics of human-brain size. We show that, starting from australopithecine brain and body sizes, the model recovers major patterns of human development and evolution, the evolution of the hominin brain-body allometry, and the evolution of brain and body sizes of six *Homo* species. Analysis reveals that in this model the brain expands because ecology and seemingly culture make brain and developmentally late reproductive tissue sizes socio-genetically covariant. The direction of brain expansion is nearly orthogonal to the direction favoured by unconstrained selection. In contrast to long-held views, in this model, unconstrained selection that does not favour brain expansion provides a force that developmental constraints divert to cause human-brain expansion.

1 The human brain provides the hardware for stun-  
2 ning achievements, but why it evolved remains unre-  
3 solved. The fossil record shows a sharp expansion in ho-  
4 minin brain size, tripling over the last four million years  
5 from australopithecines to modern humans<sup>1</sup> while some  
6 *Homo* were small-brained<sup>2,3</sup>. Many hypotheses exist for  
7 why such human brain expansion occurred<sup>4-11</sup>. These  
8 hypotheses are actively tested, mostly either with correl-  
9 ative studies<sup>12,13</sup> or comparative studies studying non-  
10 hominin species<sup>14,15</sup>. Yet, establishing what were the  
11 causes of human brain expansion remains a major mul-  
12 tidisciplinary challenge.

13 Given the practical impossibilities of empirical manip-  
14 ulative testing in humans, a complementary approach to  
15 identify the causes of human brain expansion is by means  
16 of modelling. Models that can mechanistically replicate  
17 the event as much as possible may be analysed to under-  
18 stand what could have caused it. It is of particular inter-  
19 est that such models can make quantitative predictions to  
20 understand why a human-sized brain evolved (e.g., of 1.3  
21 kg). Although qualitative predictions are insightful<sup>16-18</sup>,  
22 they may not be sufficient as what favours a large brain  
23 may not necessarily yield a human-sized brain, but pos-  
24 sibly one too small or too large for a human.

25 A recent mathematical model — hereafter, the brain  
26 model — can make quantitative predictions for brain size  
27 evolution<sup>19</sup>. In doing so, the brain model can mechanisti-  
28 cally replicate the evolution of adult brain and body sizes  
29 of six *Homo* species and much of the timing of human  
30 development including the length of childhood, adoles-  
31 cence, and adulthood<sup>20</sup>. Analysis of this brain model<sup>20</sup>  
32 has found causal, computational evidence that a chal-  
33 lenging ecology<sup>5,11</sup> and seemingly culture<sup>8,10</sup> drove hu-  
34 man brain expansion, rather than social interactions as  
35 proposed by some influential hypotheses<sup>6,7</sup>. This role  
36 of culture is inferred from the model because for human  
37 brain expansion to occur in the model it is necessary that

an already skilled individual can continue to learn, which  
cultural knowledge in the population could allow for.

The brain model makes quantitative predictions by ex-  
plicitly considering development, that is, the construc-  
tion of the phenotype over life. In particular, the model  
describes the construction of brain and body sizes over  
life using energy conservation analysis. To do this, the  
model follows the approach of West et al.<sup>21</sup>, whereby en-  
ergy conservation analysis yields an equation describing  
the developmental dynamics of body size depending on  
parameters measuring metabolic costs that can be eas-  
ily estimated from data. The brain model implements  
West et al.'s approach to obtain equations describing the  
developmental dynamics of brain, reproductive, and so-  
matic tissue sizes depending additionally on genotypic  
traits controlling energy allocation to the growth of each  
tissue at each age<sup>19</sup>. The brain model thus depends on  
parameters measuring brain metabolic costs, which are  
thought to be a key reason not to evolve large brains<sup>22</sup>  
and which are easily estimated from existing data<sup>23</sup>. In  
the brain model, the genotypic traits evolve, which leads  
to the evolution of brain and body sizes in kg, whose units  
arise from the empirically estimated metabolic costs.

Further understanding from the brain model has been  
hindered by the long-standing lack of mathematical syn-  
thesis between development and evolution, but this  
problem has been recently overcome. To consider de-  
velopmental dynamics, the brain model was evolution-  
arily static: it had to assume evolutionary equilibrium  
where fitness is maximised and so was analysed using  
dynamic optimisation, specifically using optimal con-  
trol theory<sup>24-26</sup>. This was done because of the long-  
standing lack of mathematical integration of develop-  
ment and evolution, which meant that there were no  
tractable methods to mathematically model the evolu-  
tionary and developmental dynamics of the brain model.  
Indeed, approaches available at the time that mathe-  
matically integrated developmental and evolutionary dy-

\*mgf3@st-andrews.ac.uk

## Box 1

**How can constraint drive change?** At first sight, constraint seen as a barrier would not be able to drive change but only block it. Yet, constraint can be a driver of change as in the following illustration. The Armero tragedy of 1985 involved the death of over 20 thousand people in the Colombian Andes following the eruption of the Nevado del Ruiz volcano. What drove or caused the Armero tragedy? The volcanic eruption melted the snow from the Nevado and the resulting mud travelled a path leading to the town Armero killing nearly all its inhabitants (Box 1 Fig. a; redrawn from ref.<sup>30</sup> p. 21). The mud was constrained to follow that path by the terrain. In this sense, the topographic constraint caused or drove the Armero tragedy by driving the mud to that town rather than to unpopulated areas or to closer and bigger towns such as Manizales. Analogously, developmental constraints limit evolution on the fitness landscape to the path where the relationship between genotype and phenotype holds (Box 1 Fig. b; from ref.<sup>31</sup>). Thus, while selection pushes evolution uphill on the fitness landscape of the genotype and phenotype (or geno-phenotype), developmental constraints drive evolution to an outcome at a path peak.

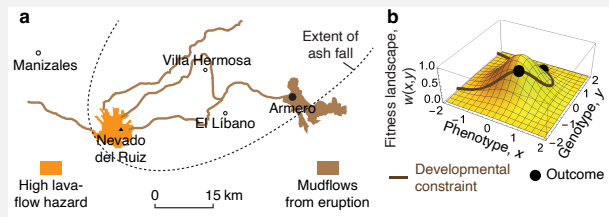

76 namics required computation of functional derivatives  
77 and solution of integro-differential equations<sup>27;28</sup>, both  
78 of which are prohibitively challenging for the relatively  
79 complex brain model. Yet, consideration of the evolu-  
80 tionary dynamics is expected to yield richer insight into  
81 why human-sized brains and bodies evolved. In particu-  
82 lar, it could allow for analysing how brain developmental  
83 constraints translate into genetic covariation, how brain  
84 metabolic costs translate into fitness costs, and what se-  
85 lection acts on in the model. This is now possible as  
86 the lack of mathematical synthesis between development  
87 and evolution has been recently overcome by a tractable  
88 mathematical framework that integrates the two, allowing  
89 for the simultaneous modeling of the evolutionary and  
90 developmental (evo-devo) dynamics in a broad class of  
91 models<sup>29</sup>.

92 To gain a deeper understanding of why human brain  
93 expansion occurred, here we implement the brain  
94 model<sup>20</sup> in the evo-devo dynamics framework<sup>29</sup>, which  
95 yields the first model of the evo-devo dynamics of human  
96 brain size. Our evo-devo dynamics approach mechanisti-  
97 cally recovers an exceptionally wide range of observations  
98 in the hominin lineage. It also enables detailed analysis  
99 revealing that the evolutionary role of ecology and culture  
100 in the recovered human brain expansion is not to affect  
101 fitness costs or benefits but to generate genetic covaria-  
102 tion that drives brain expansion. Moreover, in contrast  
103 to long-held views, our analysis reveals that human brain  
104 expansion in the model is driven by developmental and  
105 consequently socio-genetic constraints rather than selec-  
106 tion on brain size (Box 1).

107 We provide an overview of the model in Methods. We  
108 describe the model in detail and derive the necessary  
109 equations for the evo-devo analysis in the Supplementary  
110 Information (SI). We provide in the SI the computer code  
111 written in the freely accessible and computationally fast  
112 Julia programming language.

## Results

### Evo-devo dynamics of brain size

We begin by describing the evo-devo dynamics of hu-  
man brain size in the model for the scenario that recov-  
ers the evolution of *Homo sapiens*' brain and body sizes  
and other properties of human development — hereafter  
the eco-social scenario. For simplicity, the model con-  
siders only females. The genotype undergoes the follow-  
ing evolutionary dynamics. In our brain evo-devo model,  
the genotype is described by growth efforts  $y_{ia}$  control-  
ling energy allocation to the growth of brain, reproduc-  
tive, or remaining somatic ( $i \in \{b, r, s\}$ ) tissues at each age  
 $a$ , where reproductive tissue is defined as referring to pre-  
ovulatory ovarian follicles. We manually identify evolu-  
tionarily initial growth efforts that enable brain expan-  
sion under the eco-social scenario previously<sup>20</sup> identi-  
fied as yielding brain and body sizes of *H. sapiens* scale  
(blue dots in Fig. 1a-c). This ancestral genotype devel-  
ops brain and body sizes of australopithecine scale (blue  
dots in Fig. 1h,o). The genotype asymptotically evolves  
to the following developmental patterns (red dots in Fig.  
1a-c). Effort for brain growth evolves from damped os-  
cillations over ontogeny to slightly more pronounced os-  
cillations (Fig. 1a). Effort for reproductive growth evolv-  
es from gradual increase over ontogeny to sharp oscilla-  
tions trending upwards (Fig. 1b). Effort for somatic growth  
evolves from gradual decrease over ontogeny to sharp os-  
cillations with three marked peaks (Fig. 1c).

These growth efforts determine the fraction  $q_{ia}$  of the  
growth metabolic rate that is allocated to the growth of  
tissue  $i$  at age  $a$  (Fig. 1d-g). The growth metabolic rate  
is the rate of heat released at rest due to growth. The frac-  
tion of growth metabolic rate entails a trade-off in energy  
allocation, such that energy allocated to the growth of a  
given tissue at a given age becomes unavailable for the  
growth of other tissues at that age. Ancestrally, there are  
two periods at 4–8 and 9–12 years of age with mild energy  
allocation to brain growth (blue dots in Fig. 1d), which

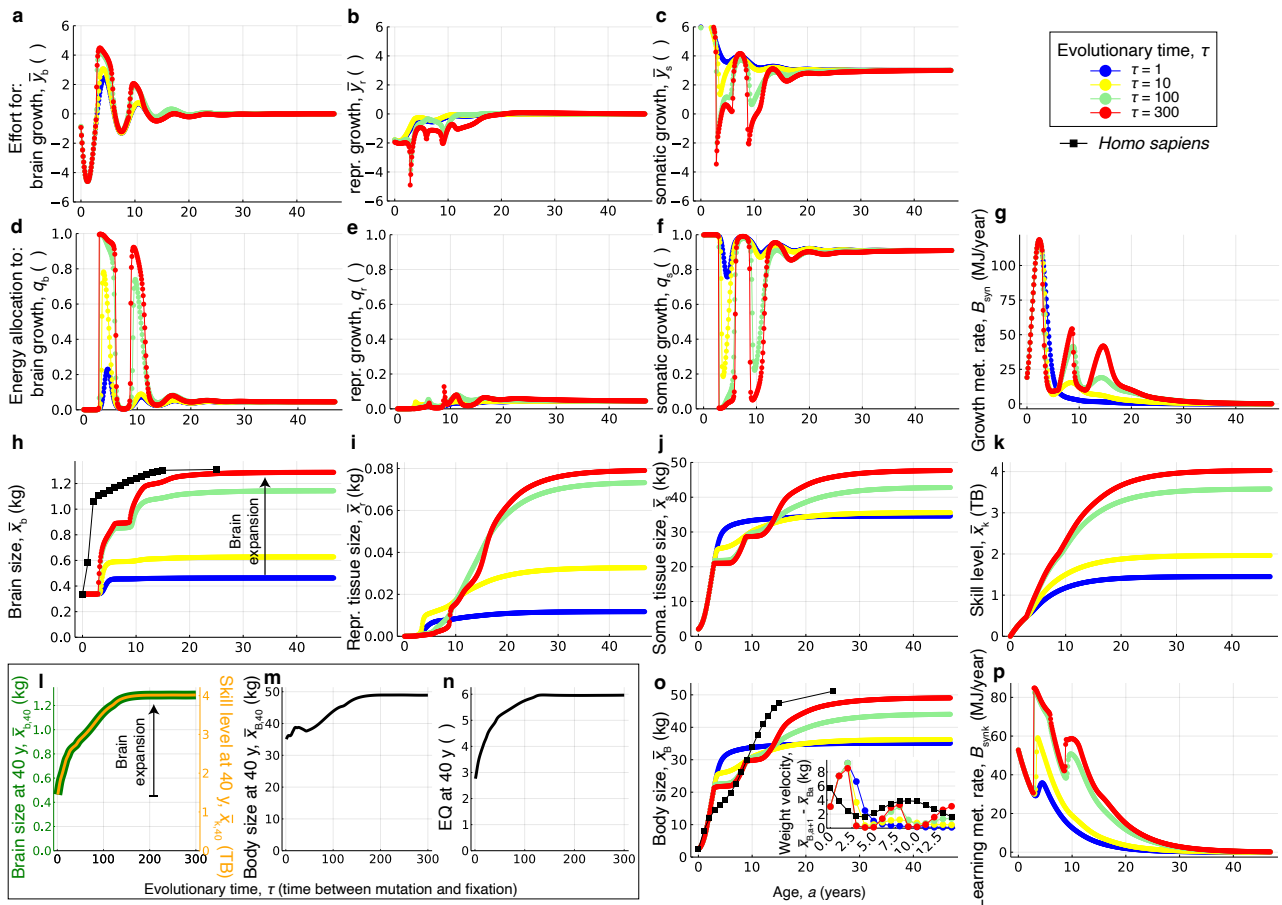

1  
2 **Figure 1: Evo-devo dynamics of human brain size.** Developmental dynamics are over age (e.g., horizontal axis in **A**)  
3 and evolutionary dynamics are over evolutionary time (differently coloured dots; top right label). Evo-devo dynamics  
4 of: **a-c**, growth efforts (genotypic traits); **d-f**, energy allocation to growth; **g**, the growth metabolic rate; **h-k**, the phenotypic  
5 traits; **o**, body size with inset plotting the yearly weight velocity showing the evolution of two growth spurts; and  
6 **p**, the learning metabolic rate. **l-n**, Evolutionary dynamics of brain size, body size, and encephalisation quotient (EQ)  
7 at 40 years of age. **h,o**, The mean observed brain and body sizes in a modern human female sample are shown in black  
8 squares in **h** and **o** (data from ref.<sup>23</sup> who fitted data from ref.<sup>32</sup>). One evolutionary time unit is the time from mutation  
9 to fixation. If gene fixation takes 500 generations and one generation is 22 years, then 300 evolutionary time steps are  
10 3.3 million years. The age bin size is 0.1 year. Halving age bin size (0.05 year) makes the evolutionary dynamics twice  
11 as slow but the system converges to virtually the same evolutionary equilibrium (Fig. S1).

151 correspond to periods of reduced allocation to somatic  
152 growth (blue dots in Fig. 1f); in turn, allocation to repro-  
153 ductive growth developmentally increases from zero after  
154 3 years of age and slowly achieves a small maximum value  
155 at around 20 years of age (blue dots in Fig. 1e). Over evo-  
156 lution, energy allocation converges to there being two pe-  
157 riods at 4-8 and 9-12 years of age with nearly full energy  
158 allocation to brain growth (red dots in Fig. 1d), which cor-  
159 respond to periods of nearly absent energy allocation to  
160 somatic growth (red dots in Fig. 1f); in turn, allocation  
161 to reproductive growth evolves, increasing slightly but  
162 remaining small throughout life with various peaks, the  
163 most marked occurring at around 9 years of age match-  
164 ing the observed age at menarche<sup>33;34</sup> (red dots in Fig. 1e).  
165 The energy allocation to reproductive growth found with  
166 the previous optimisation approach<sup>20</sup> was substantial,  
167 but this occurred in developmental periods where growth  
168 metabolic rate was nearly zero, so such high energy allo-  
169 cation was immaterial.

The obtained evolution of energy allocation to growth  
yields the following evo-devo dynamics in the phenotype.  
Adult brain size nearly triples from less than 0.5 kg to  
around 1.3 kg matching that observed in modern human  
females<sup>32;35;23</sup> (Fig. 1h). The resulting rate of develop-  
mental brain growth in the model is slower than that ob-  
served and than that obtained in the previous optimisa-  
tion approach<sup>20</sup>, which was already delayed possibly be-  
cause the developmental Kleiber's law we use underesti-  
mates resting metabolic rate at small body sizes (Fig. C in  
ref.<sup>19</sup>; Fig. S2B in ref.<sup>36</sup>). The added developmental delay  
might be partly due to our use of relatively coarse age bins  
(0.1 year) rather than the (nearly) continuous age used  
previously<sup>20</sup>, although halving age bin size (0.05 year) has  
no effect (Fig. S1). Another factor possibly contributing to  
the added developmental delay is that the resulting exact  
pattern of brain growth depends on the ancestral geno-  
typic traits (compare the red dots of Fig. 1h with those  
of Fig. S4). These slightly different results from different

189 ancestral genotypes may be partly because of slow evolu- 250  
190 lutionary convergence to equilibrium, and possibly also 251  
191 because there is socio-genetic covariation only along the 252  
192 path where the developmental constraint is met (Box 1 253  
193 Fig. b; so  $L_z$  in Eq. M5, a matrix that is a mechanistic, 254  
194 generalised analogue of Lande's<sup>37</sup>  $G$  matrix, is singular) 255  
195 which means that the evolutionary outcome depends on 256  
196 the evolutionarily initial conditions<sup>38;29</sup>. 257

197 Reproductive tissue determines fertility in the model, 258  
198 so the developmental onset of reproduction occurs when 259  
199 reproductive tissue becomes appreciably non-zero and 260  
200 gives the age of "menarche" in the model. Reproductive 261  
201 tissue evolves from developmentally early occurrence 262  
202 since around year 4 and small sizes late in life to devel- 263  
203 opmentally late occurrence since around year 9 and large 264  
204 sizes late in life (Fig. 1i). That is, the evolved females have 265  
205 higher fertility and become fertile at a later age relative 266  
206 to ancestral females, consistently with empirical analy- 267  
207 ses<sup>33;39-41</sup>. 268

208 As somatic tissue is much larger than brain and repro- 269  
209 ductive tissues, the evo-devo pattern of body size is sim- 270  
210 ilar to that of somatic tissue (Fig. 1j,o). Body size an- 271  
211 cestrally grows quickly over development and reaches a 272  
212 small size of around 35 kg (blue dots Fig. 1o), and then 273  
213 evolves so it grows more slowly to a bigger size of around 274  
214 50 kg (red dots Fig. 1o), consistently with empirical anal- 275  
215 yses<sup>33;42</sup>. Body size evolves from a smooth developmen- 276  
216 tal pattern with one growth spurt to a kinked pattern with 277  
217 three growth spurts, which are most easily seen as peaks 278  
218 in a weight velocity plot<sup>43;33;44</sup> (Fig. 1o inset). 279

219 The three evolved growth spurts qualitatively match 280  
220 the three major growth spurts in modern humans. In hu- 281  
221 man females, the first growth spurt occurs before birth, 282  
222 the second — known as mid-growth spurt — peaks during 283  
223 mid-childhood<sup>45</sup>, and the third is the adolescent growth 284  
224 spurt<sup>33;44</sup>. The mid-growth spurt is not observed with 285  
225 the spline fitting method used by Kusawa et al.<sup>23</sup> (black 286  
226 squares in Fig. 1o inset) but it is with kernel fitting used by 287  
227 Gasser et al.<sup>45</sup>, which is sometimes preferred<sup>33</sup> (p. 203). 288  
228 Our model thus recovers an ancestral lack of adolescent 289  
229 growth spurt and its evolved presence, which is consis- 290  
230 tent with previous analyses of fossil and extant primate 291  
231 data<sup>33</sup>. Yet, due to the delayed developmental rate recov- 292  
232 ered, the growth spurts are ontogenetically delayed in the 293  
233 model relative to observation.

234 The model offers a mechanistic explanation for the 294  
235 evolution of the mid- and adolescent growth spurts. Pre- 295  
236 vious descriptive mathematical models of human growth 296  
237 replicate growth spurts by being fitted to data<sup>46;47</sup>, but 297  
238 their lack of mechanistic underpinning has limited their 298  
239 explanatory ability<sup>33</sup>. The adolescent growth spurt has 299  
240 been suggested to function to end growth<sup>48</sup> at a relatively 300  
241 early age<sup>49</sup> with sexual, psychological, economic, and so- 301  
242 cial implications<sup>33;50</sup>. Tanner<sup>51</sup> introduced a conceptual 302  
243 model to explain the abrupt change during growth spurts, 303  
244 which Bogin<sup>52</sup> later conceptualised in terms of catastro- 304  
245 phe theory<sup>33</sup> (p. 208-223). Our model recovers the abrupt 305  
246 change during growth spurts and offers an explanation 306  
247 for their occurrence. In the model, the mid- and ado- 307  
248 lescent growth spurts are a consequence of brain expan- 308  
249 sion: they evolve as energy allocation to brain growth

evolves from moderate to extreme (Fig. 1d,f), which gen- 250  
erates two corresponding peaks in the growth metabolic 251  
rate (Fig. 1g) and so a surplus of energy available relative 252  
to the energy needed for tissue maintenance during such 253  
peaks; the abrupt change during growth spurts arises be- 254  
cause of the evolved sudden change in allocation to so- 255  
matic growth over development (known as a bang-bang 256  
strategy in life history and optimal control theories). 257

258 The growth spurts we recover depend on the ances- 259  
259 tral genotype: for instance, the evolved mid-growth spurt 260  
is developmentally sooner thus merging with the first 261  
growth spurt if the ancestral genotype is optimal when in- 262  
dividuals only face ecological challenges (Fig. S4). In hu- 263  
mans, girls experience menarche typically after the ado- 264  
lescent growth spurt, whereas boys usually reach repro- 265  
ductive maturity before the adolescent growth spurt (e.g., 266  
ref.<sup>33</sup>, Chapter 3). Our evo-devo model finds the reverse 267  
to the girl sequence although the correct sequence was 268  
found with the previous optimisation approach<sup>20</sup>; per- 269  
haps this incorrect sequence of the evo-devo model can 270  
be corrected by adjusting the ancestral genotype. Yet, 271  
even though the rates of brain and body growth are sensi- 272  
tive to the ancestral genotype, the evolved adult brain and 273  
body sizes are much less dependent on such conditions 274  
(compare red dots at adult ages in Figs. 1h,o and S4h,o).

275 Adult skill level evolves expanding from slightly over 1 276  
TB to 4 TB, the units of which arise from the used value of 277  
the metabolic cost of memory which is within an empiri- 278  
cally informed range<sup>53</sup> (Fig. 1k). The learning metabolic 279  
rate, which is the brain's metabolic rate due to learning at 280  
each age, increases over evolutionary time (Fig. 1p).

281 These patterns generate associated expansions in 282  
282 brain, body, and encephalisation quotient (EQ)<sup>54</sup> for 40 283  
year-old individuals (Fig. 1l-n). EQ measures here brain 284  
size relative to the expected brain size for a given mam- 285  
mal body size<sup>55</sup>. Adult brain size expands more sharply 286  
than adult body size (Fig. 1l,m). Consequently, adult brain 287  
size evolves from being ancestrally 3 times larger than ex- 288  
pected to be 6 times larger than expected (Fig. 1n). Thus, 289  
the brain expands beyond what would be expected from 290  
body expansion alone, in which case EQ would remain 291  
constant. This observation often suggests that such brain 292  
expansion is driven by selection rather than constraint. 293  
However, our analyses below reveal otherwise.

## 294 Recovery of hominin brain-body allometry 294

295 The evolutionary process described above closely recov- 296  
296 ers the observed brain-body allometry in hominins start- 297  
ing from brain and body sizes of australopithecine scale 298  
and generating a slope of 1.86 (Fig. 2a). There is some dis- 299  
crepancy, particularly in adult body size, but some of this 300  
discrepancy may arise because the model considers only 301  
females whereas the data (green squares) in Fig. 2a are for 302  
mixed sexes and allometries may be sex-dependent<sup>56</sup>. 303

304 To what extent is the recovered brain-body allometry 305  
305 due to selection or constraint? To explore this question, 306  
we randomly sampled growth efforts (genotypes) under 307  
the eco-social scenario and plotted the developed adult 308  
brain and body sizes without evolution, which yields a 309  
tight brain-body allometry with slope 0.54 (Fig. 2b). A 310

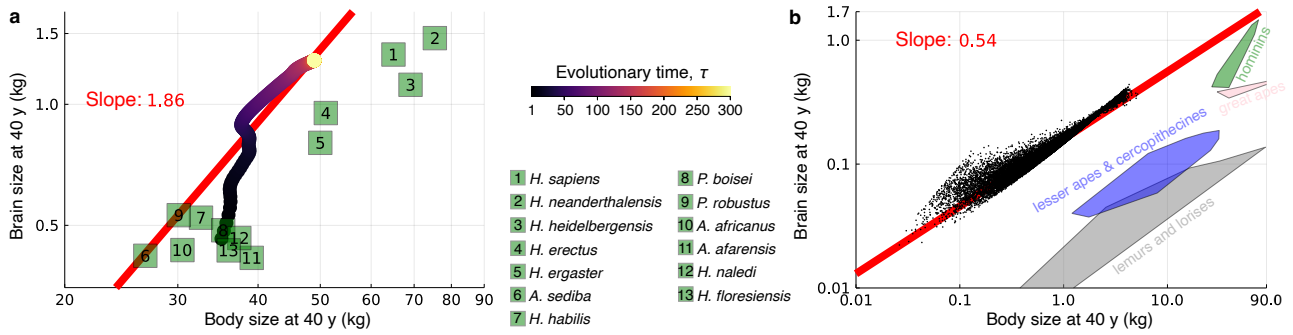

12

13 **Figure 2: Recovery of hominin brain-body allometry.** **a**, Brain size at 40 years of age vs body size at 40 years of age over  
 14 evolutionary time in log-log scale for the evolutionary process of Fig. 1. A linear regression over this trajectory yields  
 15 a slope of 1.86 (red line). As test data (i.e., data not fed into the model but to test it against), the values for 12 hominin  
 16 species are shown in green squares, which excluding *H. floresiensis* and *H. naledi* have a slope of  $1.10^{57}$  (from mixed-  
 17 sex data for 11 species from ref.<sup>57</sup> in turn taken from refs.<sup>58;59</sup>, for *H. floresiensis* from ref.<sup>2</sup>, and for *H. naledi* from  
 18 ref.<sup>3</sup>); Pilbeam and Gould<sup>60</sup> found a slope of 1.7 in hominins. *H.*: *Homo*, *A.*: *Australopithecus*, and *P.*: *Paranthropus*.  
 19 **b**, Dots are brain and body sizes of “non-failed” organisms at 40 years of age developed under the brain model for  
 20  $10^6$  randomly sampled genotypes (i.e., growth efforts, drawn from the normal distribution with mean 0 and standard  
 21 deviation 4). “Failed” organisms (not shown) at 40 years of age have small bodies (< 100 grams) entirely composed of  
 22 brain tissue due to tissue decay from birth (Fig. S5). Coloured regions encompass extant and fossil primate species  
 23 from ref.<sup>57</sup> (excluding three fossil, outlier cercopithecoines).

309 similar slope but with a lower intercept is found in other  
 310 primates (Fig. 2b;<sup>57</sup>). As there is only development but no  
 311 evolution, this 0.54 slope arises purely from developmen-  
 312 tal canalization sensu Waddington<sup>61</sup>. For the sample size  
 313 used, no organism with random genotype reaches homi-  
 314 ninin brain and body sizes (green region in Fig. 2b). The  
 315 recovered high intercept from developmental canaliza-  
 316 tion means that the developed brain size is relatively large  
 317 for the developed body size; such high intercept arises be-  
 318 cause of the parameter values in the eco-social scenario  
 319 including a high proportion of moderately difficult eco-  
 320 logical challenges, a weakly decelerating energy extrac-  
 321 tion efficiency (EEE), and a high metabolic cost of mem-  
 322 ory (Fig. 6F of ref.<sup>19</sup>). The difference between the 1.86  
 323 slope obtained with evolution and the 0.54 slope obtained  
 324 without it might suggest that the former slope is partly  
 325 due to selection. However, it is challenging to disentangle  
 326 selection and constraint in the recovered brain expansion  
 327 by analysing brain-body allometry, a point made be-  
 328 fore<sup>62</sup>.

### 329 Analysis of the action of selection

330 To draw firmer conclusions regarding what drives the ob-  
 331 tained brain expansion, we now quantify genetic covari-  
 332 ation and direct (i.e., unconstrained) selection which for-  
 333 mally separate the action of constraint and selection on  
 334 evolution. Such formal separation was first formulated  
 335 for short-term evolution under the assumption of negli-  
 336 gible genetic evolution<sup>37;64</sup> and is now available for long-  
 337 term evolution under non-negligible genetic evolution<sup>29</sup>.  
 338 We first analyse the action of selection. In the brain  
 339 model, fertility is proportional to the size of reproductive  
 340 tissue whereas survival is constant as a first approxima-  
 341 tion. Then, in the brain model there is always positive di-  
 342 rect selection for ever-increasing size in reproductive tis-

sue, but there is no direct selection for brain size, body  
 size, skill level, or anything else (Fig. 3a-d; Eq. M3). So  
 the fitness landscape in geno-phenotype space (as in Box  
 1 Fig. b) has no internal peaks and unconstrained selec-  
 tion only favours an ever larger reproductive tissue. Since  
 there is only direct selection for reproductive tissue, the  
 evolutionary dynamics of brain size  $\bar{x}_{ba}$  at age  $a$  satisfy

$$\frac{d\bar{x}_{ba}}{d\tau} = \iota \sum_{j=1}^{N_a} L_{x_{ba}, x_{rj}} \frac{\partial w_j}{\partial x_{rj}}, \quad (1)$$

where  $\iota$  is a non-negative scalar measuring mutational  
 input,  $L_{x_{ba}, x_{rj}}$  is the mechanistic additive socio-genetic  
 covariance between brain size at age  $a$  and the size of  
 reproductive tissue at age  $j$ ,  $w_j$  is fitness at age  $j$ , and  
 $\partial w_j / \partial x_{rj}$  is the direct selection gradient of reproductive  
 tissue at age  $j$ . Eq. (1) shows that brain size evolves in the  
 brain model only because brain size is socio-genetically  
 correlated with reproductive tissue (i.e., setting the socio-  
 genetic covariation between brain and reproductive tis-  
 sue sizes to zero in Eq. 1, so  $L_{x_{ba}, x_{rj}} = 0$  for all ages  
 $a$  and  $j$ , yields no brain size evolution).

Assuming evolutionary equilibrium, the brain model  
 was previously found<sup>20</sup> to recover the evolution of the  
 adult brain and body sizes of six *Homo* species by vary-  
 ing only the proportion of the different types of energy  
 extraction challenges faced at each age and the shape of  
 how EEE relates to skill level. We recover these results with  
 our evo-devo dynamics approach (Fig. 4). The factors  
 identified as driving brain expansion when varying these  
 conditions were an increasing proportion of moderately  
 difficult ecological rather than social challenges and an  
 EEE that switches from decelerating quickly with increas-  
 ing skill (e.g., a skilled forager cannot further improve  
 their foraging ability) to decelerating slowly (a skilled for-  
 ager can continue to improve their foraging ability, for in-  
 stance, by learning from the cultural knowledge “accumu-

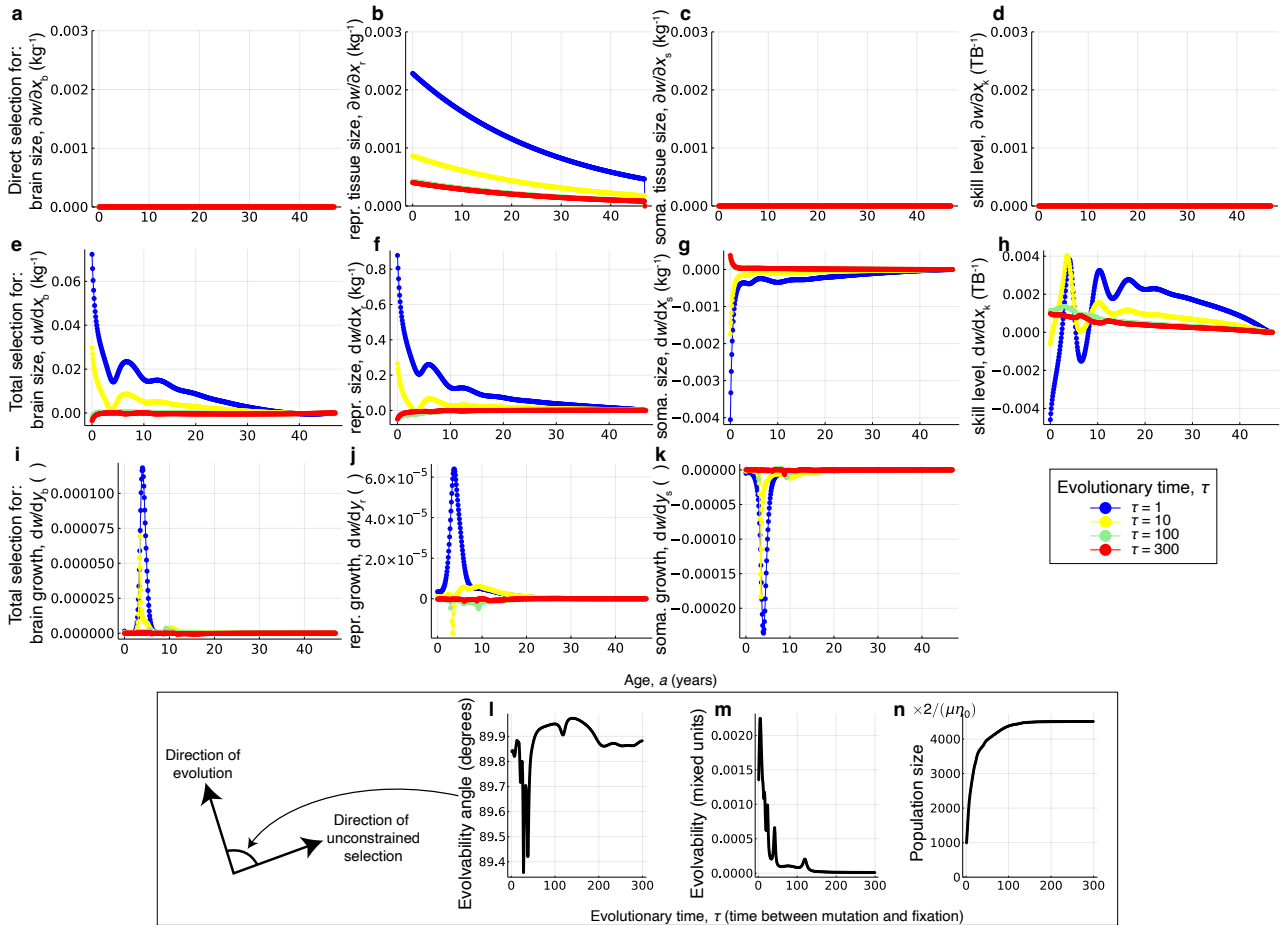

24

25 **Figure 3: The action of selection.** **a-d**, Direct (i.e., unconstrained) selection on brain, reproductive, and somatic tissues, and on skill level at each age over evolutionary time. **e-h**, Total (i.e., constrained) selection on brain, reproductive, and somatic tissues, and on skill level at each age over evolutionary time. **i-k**, Total selection on allocation effort for brain, reproductive, and somatic tissue growth at each age over evolutionary time. **l**, Angle between the direction of evolution and unconstrained selection, both of the geno-phenotype, over evolutionary time. **m**, Evolvability over evolutionary time (0 means no evolvability, 1 means perfect evolvability, SI section S6; Eq. 1 of ref.<sup>63</sup>). **n**, Population size (plot of  $\frac{1}{2}\mu\bar{n}^*\eta_0$ , so the indicated multiplication yields population size). Mutation rate  $\mu$  and parameter  $\eta_0$  can take any value satisfying  $0 < \mu \ll 1$  and  $0 < \eta_0 \ll 1/(N_g N_a)$ , where the number of genotypic traits is  $N_g = 3$  and the number of age bins is  $N_a = 47y/0.1y$ . If  $\mu = 0.01$  and  $\eta_0 = 1/(3 \times 47y/0.1y)$ , then a population size of  $1000 \times 2/(\mu\eta_0)$  is 282 million individuals (which is unrealistically large due to our assumption of marginally small mutational variance to facilitate analysis). All plots are for the evolutionary process of Fig. 1.

376 lated" in the population). This indicated that ecology and evolution  
377 culture drive human brain expansion in the model<sup>20</sup>.

378 Our evo-devo dynamics approach enables deeper evolutionary  
379 evolutionary analysis of this finding. In the brain model, challenge  
380 challenge proportion and the shape of EEE only directly affect the  
381 developmental map ( $\mathbf{g}_a$ ) but not fitness, so varying challenge proportions  
382 and the shape of EEE does not affect the direction of unconstrained  
383 selection, but only its magnitude (Eqs. S41). Hence, the various evolutionary  
384 outcomes matching six *Homo* species<sup>20</sup> (Fig. 4) arise in this model  
385 exclusively due to change in developmental constraints and not from  
386 change in direct selection on brain size or cognitive abilities. Moreover,  
387 from the equation that describes the long-term evolutionary dynamics  
388 (Eq. M5) it follows that varying challenge proportions and the shape  
389 of EEE only affects evolutionary outcomes (i.e., path peaks; Box 1 Fig. b)  
390 by affecting

393 the mechanistic socio-genetic covariation  $\mathbf{L}_z$  (Eq. S32).  
394 That socio-genetic covariation determines evolutionary outcomes  
395 despite no internal fitness landscape peaks is possible because there  
396 is socio-genetic covariation only along the path where the developmental  
397 constraint is met (so  $\mathbf{L}_z$  is always singular<sup>29</sup>) and consequently  
398 evolutionary outcomes occur at path peaks rather than landscape  
399 peaks<sup>31</sup> (Box 1 Fig. b). That is, the various evolutionary outcomes  
400 matching six species of *Homo*<sup>20</sup> (Fig. 4) are exclusively due to  
401 change in mechanistic socio-genetic covariation described by the  
402  $\mathbf{L}_z$  matrix, by changing the position of path peaks on the peak-  
403 invariant fitness landscape. Therefore, ecology and culture drive  
404 human brain expansion in the model by affecting developmental and  
405 consequently socio-genetic constraints rather than unconstrained  
406 selection. Additionally, brain metabolic costs directly affect the  
407 developmental map ( $\mathbf{g}_a$ ) and so affect  
408  
409

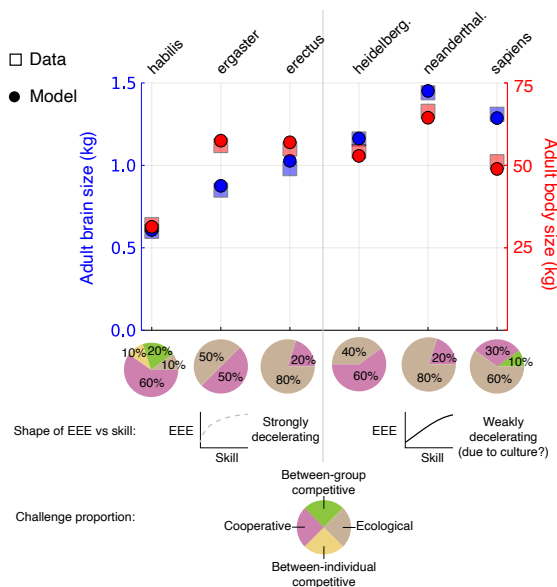

36

37 **Figure 4: Evolution of brain and body sizes of six *Homo***  
 38 **species solely by changing socio-genetic covariation.**

39 Adult brain and body sizes six *Homo* species evolve in the  
 40 model only by changing the challenge proportion and the  
 41 shape of energy extraction efficiency (EEE) with respect  
 42 to skill. Squares are the observed brain and body sizes  
 43 for the corresponding species (data from refs.<sup>23,32;65–69</sup>).  
 44 Dots are the evolved values in the model for a 40-year-  
 45 old using our evo-devo dynamics approach under six sce-  
 46 narios starting from the australopithecine ancestral con-  
 47 dition (Fig. 1). Pie charts give the challenge proportions  
 48 used in each scenario. The shape of EEE in each scenario  
 49 is either strongly (for the left 3 scenarios) or weakly (for  
 50 the right 3 scenarios) decelerating. These challenge pro-  
 51 portions and shape of EEE were identified previously as-  
 52 suming evolutionary equilibrium<sup>20</sup>. In principle, weakly  
 53 decelerating EEE might arise from culture. Varying chal-  
 54 lenge proportion and the shape of EEE only varies socio-  
 55 genetic covariation  $\mathbf{L}_z$ , but not the direction of the selec-  
 56 tion gradient  $\partial w/\partial \mathbf{z}$  or where it is zero (it never is). The  
 57 final evolutionary time is 300 for all six scenarios except  
 58 for the *habilis* scenario, where it is 500 due to slower evo-  
 59 lutionary convergence of adult values.

410 mechanistic socio-genetic covariation ( $\mathbf{L}_z$ ) but do not di-  
 411 rectly affect fitness ( $w$ ) and so do not constitute direct fit-  
 412 ness costs (Eqs. S8, S10, S2, S9, and M3).

413 Despite absence of unconstrained selection on brain  
 414 or skill in the model, there is constrained selection on  
 415 the various traits. Constrained, or total, selection is mea-  
 416 sured by total selection gradients that quantify the total  
 417 effect of a trait on fitness considering the developmental  
 418 constraints and so how traits affect each other over de-  
 419 velopment<sup>29;70</sup>. Thus, in contrast to direct selection, to-  
 420 tal selection does not separate the action of selection and  
 421 constraint. Since we assume there are no absolute muta-  
 422 tional constraints (i.e.,  $\mathbf{H}_y$  is non-singular), evolution-  
 423 ary outcomes occur at path peaks in the fitness landscape  
 424 where total genotypic selection vanishes ( $d\mathbf{w}/d\mathbf{y} = \mathbf{0}$ ),  
 425 which are not necessarily fitness landscape peaks where  
 426 direct selection vanishes ( $\partial w/\partial \mathbf{z} \neq \mathbf{0}$ ). Constrained selec-

tion ancestrally favours increased brain size throughout  
 life (blue circles in Fig. 3e). As evolution advances, con-  
 strained selection for brain size decreases and becomes  
 negative early in life, possibly due to our assumption that  
 the brain size of a newborn is fixed and cannot evolve.  
 A similar pattern results for constrained selection on re-  
 productive tissue (Fig. 3f). Somatic tissue is ancestrally  
 totally selected against throughout life, but it eventually  
 becomes totally selected for (Fig. 3g). Constrained selec-  
 tion for skill level ancestrally fluctuates across life but it  
 becomes and remains positive throughout life as evolu-  
 tion proceeds (Fig. 3h). Thus, constrained selection still  
 favours evolutionary change in the phenotype at evolu-  
 tionary equilibrium, but change is no longer possible (red  
 dots in Fig. 3e-h are at non-zero values). This means that  
 evolution does not and cannot reach the favoured total  
 level of phenotypic change in the model.

Although evolution does not reach the favoured total  
 level of *phenotypic* change in the model, it does reach  
 the favoured total level of *genotypic* change because of  
 our assumption of no absolute mutational constraints.  
 Constrained selection for the genotypic trait of brain  
 growth effort is ancestrally strongly positive around the  
 age of onset of brain growth and evolves toward zero  
 (Fig. 3i). Constrained genotypic selection for reproduc-  
 tive growth effort is ancestrally strongly positive around  
 the age of menarche, transiently evolves to strongly neg-  
 ative around the age of menarche and to positive around  
 the age of a second growth spurt in reproductive tissue,  
 and eventually approaches zero (Fig. 3j). Constrained  
 genotypic selection for somatic growth effort is ances-  
 trally strongly negative around the age of onset of brain  
 growth and evolves toward zero (Fig. 3k). The evolved lack  
 of constrained genotypic selection means that evolution  
 reaches the favoured total level of genotypic change. This  
 also means that evolution stops at a path peak on the fit-  
 ness landscape (as in Box Fig. b).

The occurrence of total selection for brain size or skill  
 level might suggest that this total selection drives brain  
 expansion in the model, but in this model total selection  
 can change the evolved brain size only due to change in  
 the developmental constraints. This is because total se-  
 lection equals the product of direct selection and total  
 developmental bias (Eqs. S36 and S37), and in the model  
 changing challenge proportions or the shape of EEE does  
 not affect the direction of direct selection but only affects  
 the direction of total developmental bias by affecting the  
 developmental constraints. Thus, varying total selection  
 can affect evolutionary outcomes in the model only if the  
 developmental constraints are changed.

We can quantify the contribution to brain expansion of  
 the different forms of selection, but this is at the cost of  
 confounding the action of selection and constraint. We  
 first quantify the contributions of direct selection on the  
 various traits. From Eq. (1), the brain expansion in Fig. 1  
 is 100% due to direct selection on reproductive tissue (i.e.,  
 the only non-zero direct selection is on reproductive tis-  
 sue, so there are no other direct selection gradients con-  
 tributing). We can alternatively quantify the contribu-  
 tions to brain expansion of total selection on the various  
*phenotypic* traits. To do this, we note that the evolution-

ary dynamics of brain size  $\bar{x}_{ba}$  equivalently satisfy

$$\frac{d\bar{x}_{ba}}{d\tau} = \iota \sum_{i \in \{b,r,s\}} \sum_{j=1}^{N_a} L_{x_{ba}, y_{ij}} \sum_{l \in \{b,r,s,k\}} \sum_{m=1}^{N_a} \frac{\partial x_{lm}}{\partial y_{ij}} \frac{dw}{dx_{lm}}, \quad (2)$$

which is in terms of total phenotypic selection ( $dw/dx_{lm}$ ). Using this equation, we find that brain expansion in Fig. 1 is, respectively, 14%, 14%, 8%, and 65% due to total selection on brain size, reproductive tissue size, somatic tissue size, and skill level (i.e., these percents are the  $l$ -th term in Eq. (2) summed over  $\tau$  divided by the total over all four  $l$  terms; SI section S7 and Fig. S6). Additionally, Eq. (2) can be rearranged to quantify the contributions to brain expansion of total selection on the various *genotypic* traits. Using such rearrangement, we find that brain expansion in Fig. 1 is, respectively, 23%, 10%, and 67% due to total selection on brain growth, reproductive growth, and somatic growth (i.e., these percents are the  $i$ -th term in Eq. (2) summed over  $\tau$  divided by the total over all three  $i$  terms). However, these percent contributions confound the action of selection and constraint as they depend on developmental constraints via both total selection and socio-genetic covariation.

Remarkably, throughout human brain expansion in the model, evolution occurs in a maximally diverted direction from that favoured by unconstrained selection. Specifically, evolutionary change in the geno-phenotype is almost orthogonal to unconstrained selection throughout the evolutionary process that yields human brain expansion (Fig. 3l). Evolvability<sup>63</sup>, measuring the extent to which evolution proceeds in the direction of unconstrained selection, is ancestrally very small and decreases toward zero as evolution proceeds (Fig. 3m). This means evolution stops because there is no longer socio-genetic variation in the direction of direct selection. The population size quadruples as the brain expands (Fig. 3n), which is broadly consistent with available estimates<sup>71</sup>.

## 522 Analysis of the action of constraint

To gain further insight into what drives the recovered brain expansion, we now analyse the action of constraint. Since there is only direct selection for reproductive tissue, the equation describing long-term evolution (Eq. M5) entails that whether or not a trait evolves in the model is dictated by whether or not there is (mechanistic) socio-genetic covariation between the trait and reproductive tissue (e.g., Eq. 1).

Examination of such covariation reveals that brain expansion in the model is driven by positive socio-genetic covariation between brain size and developmentally late reproductive tissue. The mechanistic socio-genetic covariation of the various phenotypes with reproductive tissue, and how such covariation evolves, are shown in Fig. 5. Socio-genetic covariation between brain size and reproductive tissue is ancestrally small (Fig. 5a). Shortly later in evolution as brain expansion proceeds, brain size at ages later than around 2 years is negatively socio-genetically covariant with reproductive tissue of until around 10 years, but strongly positively socio-genetically

covariant with reproductive tissue of later years (Fig. 5b). This pattern is maintained as evolution proceeds, but the magnitude of covariation decreases and somewhat increases again (Fig. 5c,d). Hence, direct selection on developmentally late reproductive tissue provides a force for reproductive tissue expansion, and socio-genetic covariation diverts this force to cause brain expansion. This occurs even though the force of selection is weaker at advanced ages<sup>72</sup> (i.e., slopes are negative in Fig. 3b), which can be compensated by high socio-genetic covariation with developmentally late reproductive tissue. Such high covariation can arise because of developmental propagation of phenotypic effects of mutations<sup>31</sup>. The role of ecology and culture in driving brain expansion in the brain model is thus to generate positive socio-genetic covariation between brain size and developmentally late reproductive tissue.

The socio-genetic covariation between body size and reproductive tissue, as well as between skill level and reproductive tissue follow a similar pattern (Fig. 5e-l). Hence, the evolutionary expansion in body size and skill level in the model are also caused by their positive socio-genetic covariation with developmentally late reproductive tissue.

The evolution of reproductive tissue size is governed by a different pattern of socio-genetic covariation between reproductive tissue and itself. Ancestrally, the socio-genetic covariance between reproductive tissue and itself increases with age but is relatively small (Fig. 5m). Shortly later in evolution, the socio-genetic covariance of reproductive tissue is higher in magnitude, being strongly positive between developmentally early reproductive tissue as well as between developmentally late reproductive tissue, but strongly negative between developmentally early and late reproductive tissue (Fig. 5n). Hence, in this evolutionary period, developmentally early reproductive tissue evolves smaller sizes because of negative socio-genetic covariation with developmentally late reproductive tissue. In turn, developmentally late reproductive tissue evolves larger sizes because of positive socio-genetic covariation with developmentally late reproductive tissue.

As evolution proceeds, positive socio-genetic covariation in reproductive tissue becomes clustered around the age of menarche (Fig. 5o,p). Hence, reproductive tissue around this age could evolve a larger size from largely direct selection on it but such evolution is prevented by its negative socio-genetic covariation with developmentally later reproductive tissue. Reproductive tissue at ages other than the age of menarche has small or negative socio-genetic covariation with itself. This pattern of clustered socio-genetic covariation does not occur for brain size, body size, or skill level (Fig. S7). In such traits, socio-genetic covariation increases with age and may also increase as evolution proceeds. Such increase in socio-genetic covariation also occurs between brain size and skill level, body size and brain size, and body size and skill level (Fig. S8).



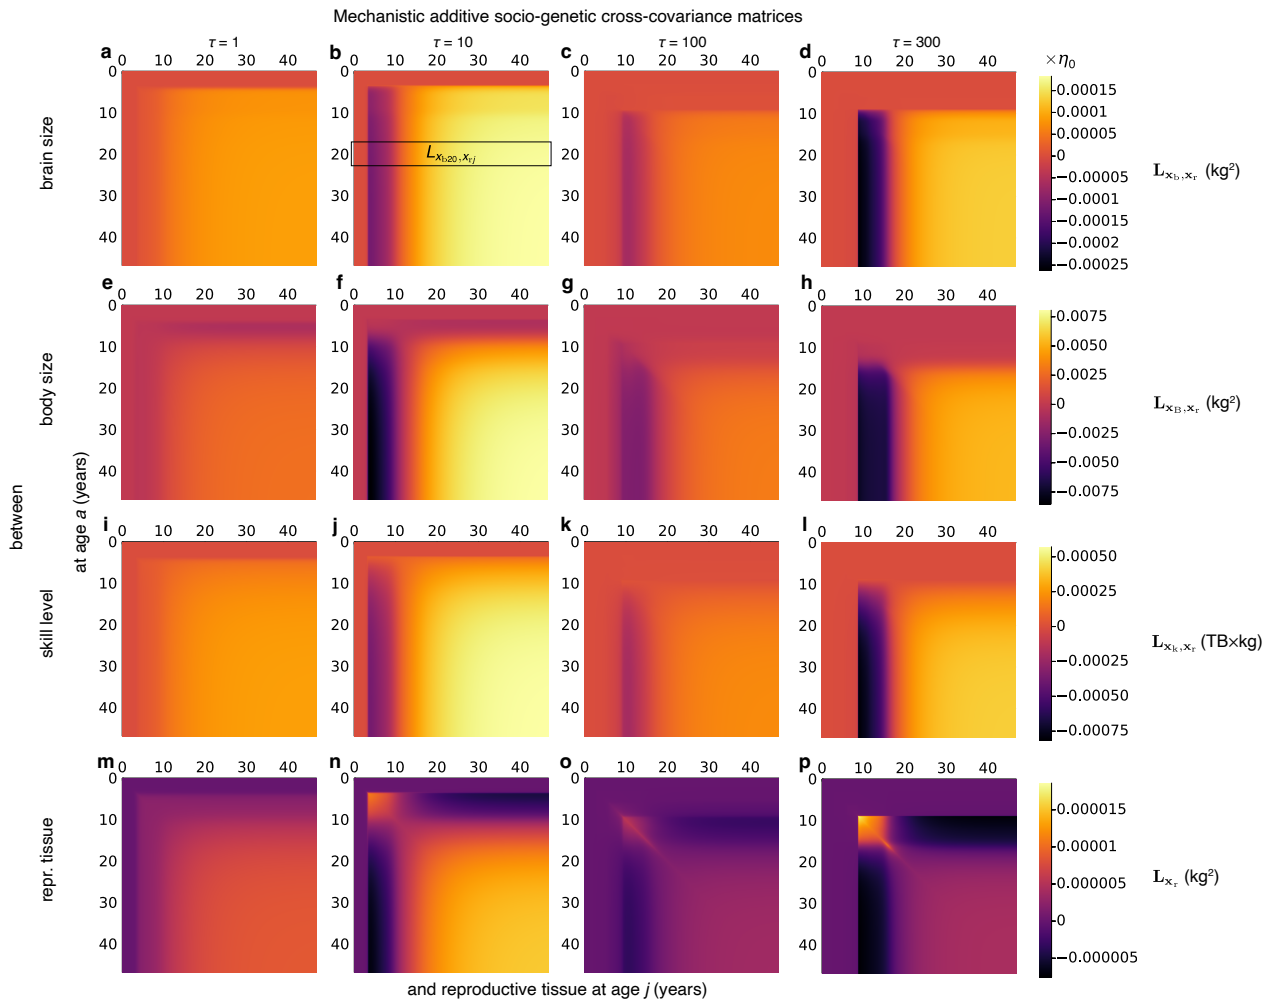

60

61 **Figure 5: The action of constraint.** Mechanistic socio-genetic cross-covariance matrix between: **a-d**, brain size (at the  
 62 ages on vertical axes) and reproductive tissue (at the ages on horizontal axes) over evolutionary time, **e-h**, body size  
 63 and reproductive tissue, **i-l**, skill level and reproductive tissue, and **m-p**, reproductive tissue and itself. All plots are for  
 64 the evolutionary process of Fig. 1.

## 600 Discussion

601 We have found that major patterns of human develop-  
 602 ment and evolution can be driven by developmental con-  
 603 straints rather than direct selection. Human brain ex-  
 604 pansion occurs in this model because brain size is socio-  
 605 genetically correlated with developmentally late repro-  
 606 ductive tissue. Such correlation is created by a moder-  
 607 ately challenging ecology and seemingly cumulative cul-  
 608 ture, which thus drive human brain expansion in this sce-  
 609 nario by modulating constraint. This covariation yields  
 610 an admissible evolutionary path on the fitness landscape  
 611 (Box 1 Fig. b), a path along which the brain expands, even  
 612 though the unconstrained direction of steepest increase  
 613 in fitness does not involve brain expansion. Thus, in this  
 614 model, human brain expansion is caused by unremark-  
 615 able selection but particular developmental constraints  
 616 involving a moderately challenging ecology and seem-  
 617 ingly cumulative culture. This constraint-driven brain ex-  
 618 pansion occurs despite it generating a strongly positive  
 619 brain-body allometry of 1.86 and a duplication of EQ.  
 620 While cognitive ability in the form of skill level is not di-  
 621 rectly under selection in the model, the model can be

622 modified to incorporate such widely considered scenario.  
 623 Yet, we find that direct selection for cognitive ability is not  
 624 necessary to recreate a wide range of aspects of human  
 625 development and evolution, whereas the action of devel-  
 626 opmental constraints with unexceptional direct selection  
 627 is sufficient. Change in development without changes  
 628 in direct selection can thus yield a rich diversity of evo-  
 629 lutionary outcomes rather than only evolutionarily tran-  
 630 sient effects.

631 These results show that developmental constraints can  
 632 have major evolutionary roles by driving human brain  
 633 expansion. Developmental constraints are traditionally  
 634 seen as preventing evolutionary change<sup>73-75</sup>, effectively  
 635 without ability to generate evolutionary change that is not  
 636 already favoured by selection. Yet, less prevalent views  
 637 have highlighted the potential relevance of developmen-  
 638 tal constraints for human brain evolution (e.g., p. 87 of  
 639 ref.<sup>76</sup>). Our findings show that while constraints do pre-  
 640 vent evolutionary change in some directions, constraints  
 641 can be “creative”<sup>77</sup> in the sense that they can divert evo-  
 642 lutionary change in a direction that causes brain expan-  
 643 sion, such that without those constraints brain expansion

644 is not favoured by selection and does not evolve.

645 Our results contrast with a previous study finding that  
646 direct selection on brain size drove brain expansion in  
647 hominins<sup>78</sup>. Such a study used the short-term restricted  
648 Lande equation<sup>37;64</sup> for this long-term inference. We use  
649 analogous equations that describe long-term evolution  
650 and that additionally formally separate the evolutionary  
651 effects of developmental constraints and direct selection  
652 — a separation that has otherwise not been clear-cut<sup>79</sup>.  
653 By doing so, we have found that human brain expansion  
654 and various features of human development could have  
655 been driven by developmental constraints and that the  
656 directional nature of human brain expansion should not  
657 be interpreted as necessarily being driven by selection.

658 Although brain expansion is driven by constraint in the  
659 model analysed, such brain expansion is not easily under-  
660 stood as a consequence of body expansion. Brain-body  
661 allometry may suggest that brain expansion could result  
662 from constraint as a result of body expansion<sup>75;12</sup>. We  
663 find that the recovered brain-body allometry is an emer-  
664 gent property that developmentally depends on complex  
665 gene-gene and gene-phenotype interactions and evolu-  
666 tionarily depends on mechanistic socio-genetic covaria-  
667 tion. In the model, there is no direct selection for body  
668 size, so unconstrained selection on body size does not  
669 drive brain expansion. Brain and body sizes expand in  
670 the model because each is socio-genetically correlated  
671 with reproductive tissue, which is the only trait directly  
672 selected in the model.

673 The model provides insight into further debated ques-  
674 tions. Variation in the timing of brain development at  
675 molecular, cellular, and histological levels has been pro-  
676 posed to lead to evolution of brain diversity<sup>80–82</sup>. Our  
677 results are consistent with these views. Adaptive expla-  
678 nations for the protracted human childhood have been  
679 advanced (e.g., ref.<sup>83</sup> as discussed on p. 82 of ref.<sup>33</sup>, and  
680 ref.<sup>84</sup>). In the model, a protracted human childhood  
681 arises from the trade-off of energy allocation between  
682 brain and somatic growth, so it is a consequence of brain  
683 expansion rather than being selected for. Mosaic evolu-  
684 tion, whereby different parts of the brain or the body  
685 evolve separately, is often taken as evidence against evolu-  
686 tionary constraints (e.g., end of section 2b of ref.<sup>75</sup>).  
687 This is not supported by the model as we find that con-  
688 straints can be drivers of brain expansion despite mo-  
689 saic evolution as brain and body sizes evolve differently  
690 in the model. Brain metabolic costs are widely seen as  
691 a key factor preventing brain expansion<sup>22;85;23</sup>. We find  
692 that such costs are not fitness costs in the model, but in-  
693 stead affect mechanistic socio-genetic covariation and so  
694 the admissible path on the fitness landscape, thus mod-  
695 ulating path peaks and evolutionary outcomes. The for-  
696 mulas provided by the evo-devo dynamics framework al-  
697 low one to compute how brain metabolic costs are trans-  
698 formed into mechanistic socio-genetic covariation or into  
699 fitness costs.

700 Our evo-devo dynamics approach offers a powerful  
701 method to advance brain evolution research. A run of  
702 the brain model using dynamic optimisation took ap-  
703 proximately 3 days to complete<sup>20</sup>, whereas using our evo-  
704 devo dynamics approach it takes approximately 3 min-

utes. This computational speed opens the door to imple-  
705 ment powerful methods of simulation-based inference<sup>86</sup>  
706 that have been very successful in other fields, such as in  
707 the discovery of the Higgs boson or in establishing that  
708 humans are causing climate change, but remain under-  
709 exploited in human brain evolution research. 710

## 711 Methods

**712 Model overview.** The evo-devo dynamics framework we  
713 use<sup>29</sup> is based on adaptive dynamics assumptions<sup>87;88</sup>.  
714 The framework considers a resident, well-mixed, fi-  
715 nite population with deterministic population dynamics  
716 where individuals can be of different ages and reproduc-  
717 tion is clonal. Population dynamics occur in a fast eco-  
718 logical timescale and evolutionary dynamics occur in a  
719 slow evolutionary timescale. Individuals have genotypic  
720 traits, collectively called the genotype, that are directly  
721 specified by genes (e.g., a continuous representation of  
722 nucleotide sequence, or traits assumed to be under direct  
723 genetic control). Also, individuals have phenotypic traits,  
724 collectively called the phenotype, that are developed, that  
725 is, constructed over life. A function  $\mathbf{g}_a$ , called the develop-  
726 mental map, describes how the phenotype is constructed  
727 over life and gives the developmental constraint. The de-  
728 velopmental map can be non-linear, evolve, change over  
729 development, and take any differentiable form with re-  
730 spect to its arguments. Mutant individuals of age  $a$  have  
731 fertility  $f_a$  (rate of offspring production) and survive to  
732 the next age with probability  $p_a$ . The evo-devo dynamics  
733 framework provides equations describing the evolution-  
734 ary dynamics of genotypic and phenotypic traits in gradi-  
735 ent form, thus describing long-term genotypic and phe-  
736 notypic evolution as the climbing of a fitness landscape  
737 while guaranteeing that the developmental constraint is  
738 met at all times. 739

740 The brain model<sup>19;20</sup> provides a specific developmen-  
741 tal map  $\mathbf{g}_a$ , fertility  $f_a$ , and survival  $p_a$ , which can be fed  
742 into the evo-devo dynamics framework to model the evolu-  
743 tionary dynamics of the developed traits studied. More  
744 specifically, the brain model considers a female popula-  
745 tion, where each individual at each age has three tissue  
746 types — brain, reproductive, and remaining somatic tis-  
747 sues — and a skill level. Reproductive tissue is defined as  
748 referring to pre-ovulatory ovarian follicles, so that repro-  
749 ductive tissue is not involved in offspring maintenance,  
750 which allows for writing fertility as being proportional to  
751 the mass of reproductive tissue, in accordance with ob-  
752 servation<sup>89</sup>. As a first approximation, the brain model  
753 lets the survival probability at each age be constant. At  
754 each age, each individual has an energy budget per unit  
755 time, her resting metabolic rate  $B_{\text{rest}}$ , that she uses to grow  
756 and maintain her tissues. The part of this energy budget  
757 used in growing her tissues is her growth metabolic rate  
758  $B_{\text{syn}}$ . A fraction of the energy consumed by the reproduc-  
759 tive tissue is for producing offspring, whereas a fraction  
760 of the energy consumed by the brain is for gaining (learn-  
761 ing) and maintaining (memory) skills. Each individual's  
762 skill level emerges from this energy bookkeeping rather  
763 than it being assumed as given by brain size. Somatic tis-

763 sue does not have a specific function but it affects body  
764 size, thus affecting the energy budget because of Kleiber's  
765 law<sup>90</sup> which relates resting metabolic rate to body size  
766 by a power law. Genes control the individual's energy al-  
767 location effort into growing brain, reproductive, and so-  
768 matic tissues at each age. The individual obtains energy  
769 by using her skills to overcome energy-extraction chal-  
770 lenges that can be of four types: ecological (e.g., foraging  
771 alone), cooperative (e.g., foraging with a peer), between-  
772 individual competitive (e.g., scrounging from a peer), and  
773 between-group competitive (e.g., scrounging with a peer  
774 from two peers). The probability of facing a challenge of  
775 type  $j$  at a given age is  $P_j$  ( $\sum_{j=1}^4 P_j = 1$ , where  $j \in \{1, \dots, 4\}$   
776 indexes the respective challenge types).

777 We describe the brain model with the notation of the  
778 evo-devo dynamics framework as follows. The model  
779 considers four phenotypic traits (i.e.,  $N_p = 4$ ): the mass  
780 of brain, reproductive, and somatic tissues, and the skill  
781 level at each age. For a mutant individual, the brain size  
782 at age  $a \in \{1, \dots, N_a\}$  is  $x_{ba}$  (in kg), the size of reproduc-  
783 tive tissue at age  $a$  is  $x_{ra}$  (in kg), the size of the remain-  
784 ing somatic tissue at age  $a$  is  $x_{sa}$  (in kg), and the skill  
785 level at age  $a$  is  $x_{ka}$  (in terabytes, TB). The units of phe-  
786 notypic traits (kg and TB) arise from the units of the pa-  
787 rameters measuring the unit-specific metabolic costs of  
788 maintenance and growth of the respective trait. The vec-  
789 tor  $\mathbf{x}_a = (x_{ba}, x_{ra}, x_{sa}, x_{ka})^\top$  is the mutant phenotype at  
790 age  $a$ . Additionally, the model considers three genotypic  
791 traits (i.e.,  $N_g = 3$ ): the effort to grow brain, reproductive,  
792 and somatic tissues at each age. For a mutant individ-  
793 ual, the growth effort at age  $a$  for brain is  $y_{ba}$ , for repro-  
794 ductive tissue is  $y_{ra}$ , and for the remaining somatic tis-  
795 sue is  $y_{sa}$ . These growth efforts are dimensionless and  
796 can be positive or negative, so they can be seen as mea-  
797 sured as the difference from a baseline growth effort. The  
798 vector  $\mathbf{y}_a = (y_{ba}, y_{ra}, y_{sa})^\top$  is the mutant growth effort at  
799 age  $a$ , which describes the mutant genotypic traits at that  
800 age. The growth efforts generate the fraction  $q_{ia}(\mathbf{y}_a)$  of  
801 the growth metabolic rate  $B_{\text{syn}}$  allocated to growth of tis-  
802 sue  $i \in \{b, r, s\}$  at age  $a$  ( $q_{ia}$  corresponds to the control  
803 variables  $u$  in refs.<sup>19,20</sup>). To describe the evolutionary dy-  
804 namics of the phenotype as the climbing of a fitness land-  
805 scape, the evo-devo dynamics framework defines the mu-  
806 tant geno-phenotype at age  $a$  as the vector  $\mathbf{z}_a = (\mathbf{x}_a; \mathbf{y}_a)$   
807 (the semicolon indicates a linebreak). The mutant phe-  
808 notype across ages is  $\mathbf{x} = (\mathbf{x}_1; \dots; \mathbf{x}_{N_a})$ , and similarly for the  
809 other variables. The mutant's  $i$ -th phenotype across ages  
810 is  $\mathbf{x}_{i\bullet} = (x_{i1}, \dots, x_{iN_a})^\top$  for  $i \in \{b, r, s, k\}$ . The mutant's  $i$ -  
811 th genotypic trait across ages is  $\mathbf{y}_{i\bullet} = (y_{i1}, \dots, y_{iN_a})^\top$  for  
812  $i \in \{b, r, s\}$ . The resident traits are analogously denoted  
813 with an overbar (e.g.,  $\bar{\mathbf{x}}$ ).

814 The brain model describes development by providing  
815 equations describing the developmental dynamics of the  
816 phenotype. That is, the mutant phenotype at age  $a + 1$  is  
817 given by the developmental constraint

$$\mathbf{x}_{a+1} = \mathbf{g}_a(\mathbf{x}_a, \mathbf{y}_a, \bar{\mathbf{x}}_{ka}). \quad (\text{M1})$$

818 The equations for the developmental map  $\mathbf{g}_a$  are given  
819 in the SI and were previously derived from mechanistic  
820 considerations of energy conservation following the rea-  
821 soning of West et al.'s metabolic model of ontogenetic

822 growth<sup>21</sup> and phenomenological considerations of how  
823 skill relates to energy extraction<sup>19,20</sup>. The developmen-  
824 tal map of the brain model depends on the skill level of  
825 social partners of the same age (i.e., peers),  $\bar{\mathbf{x}}_{ka}$ , because  
826 of social challenges of energy extraction (where  $P_1 < 1$ ) so  
827 we say that development is social. When individuals face  
828 only ecological challenges (i.e.,  $P_1 = 1$ ), development is  
829 not social.

830 The evo-devo dynamics are described by the devel-  
831 opmental dynamics of the phenotypic traits given by  
832 Eq. (M1) and by the evolutionary dynamics of the geno-  
833 typic traits. The latter are given by the canonical equation  
834 of adaptive dynamics<sup>87</sup>

$$\frac{\Delta \bar{\mathbf{y}}}{\Delta \tau} = \iota \mathbf{H}_y \frac{d\mathbf{w}}{d\mathbf{y}}, \quad (\text{M2})$$

835 where  $\tau$  is evolutionary time,  $\iota$  is a non-negative scalar  
836 measuring mutational input and is proportional to the  
837 mutation rate and carrying capacity, and  $\mathbf{H}_y = \text{cov}[\mathbf{y}, \mathbf{y}]$  is  
838 the mutational covariance matrix (H for heredity; deriva-  
839 tives are evaluated at resident trait values throughout and  
840 we use matrix calculus notation as in Eq. S1). Due to  
841 age-structure, a mutant's relative fitness is  $w = \sum_{a=1}^{N_a} w_a =$   
842  $\frac{1}{T} \sum_{a=1}^{N_a} (\phi_a f_a + \pi_a p_a)$ , where  $f_a$  and  $p_a$  are a mutant's fer-  
843 tility and survival probability at age  $a$ ,  $T$  is generation  
844 time, and  $\phi_a$  and  $\pi_a$  are the forces<sup>72</sup> of selection on fer-  
845 tility and survival at that age ( $T$ ,  $\phi_a$ , and  $\pi_a$  are functions  
846 of the resident but not mutant trait values). After substitu-  
847 tion and simplification, a mutant's relative fitness reduces  
848 to

$$w = \frac{1}{\sum_{a=1}^{N_a} a p^{a-1} \bar{x}_{ra}} \sum_{j=1}^{N_a} \left( p^{j-1} x_{rj} + \sum_{k=j+1}^{N_a} p^{k-1} \bar{x}_{rk} \right), \quad (\text{M3})$$

849 where  $p$  is the constant probability of surviving from  
850 one age to the next. This fitness function depends di-  
851 rectly on the mutant's reproductive tissue size, but only  
852 indirectly on metabolic costs via the developmental con-  
853 straint (i.e., after substituting  $x_{rj}$  for the corresponding  
854 entry of Eq. (M1)).

855 Eq. (M2) thus depends on the total selection gradient of  
856 genotypic traits  $d\mathbf{w}/d\mathbf{y}$ , which measures total genotypic  
857 selection. While Lande's<sup>37</sup> selection gradient measures  
858 unconstrained selection by using partial derivatives ( $\partial$ ),  
859 total selection gradients measure constrained selection  
860 by using total derivatives ( $d$ ). Lande's selection gradient  
861 thus measures the direction in which selection favours  
862 evolution to proceed without considering any constraint,  
863 whereas total selection gradients measure the direction in  
864 which selection favours evolution considering the devel-  
865 opmental constraint (M1). The total selection gradient of  
866 genotypic traits for the brain model is

$$\frac{d\mathbf{w}}{d\mathbf{y}} = \frac{\partial \mathbf{x}^\top}{\partial \mathbf{y}} \frac{d\mathbf{w}}{d\mathbf{x}} = \frac{d\mathbf{x}^\top}{d\mathbf{y}} \frac{\partial \mathbf{w}}{\partial \mathbf{x}}. \quad (\text{M4})$$

867 Eq. (M4) shows that total genotypic selection can be writ-  
868 ten in terms of either total phenotypic selection ( $d\mathbf{w}/d\mathbf{x}$ )  
869 or direct phenotypic selection ( $\partial \mathbf{w}/\partial \mathbf{x}$ ). Eqs. (M1) and  
870 (M2) together describe the evo-devo dynamics. Eq. (M2)  
871 entails that total genotypic selection vanishes at evolu-  
872 tionary equilibria if there are no absolute mutational con-  
873 straints (i.e., if  $\iota > 0$  and  $\mathbf{H}_y$  is non-singular). Moreover,

874 since there are more phenotypic traits than genotypic  
875 traits ( $N_p > N_g$ ), the matrices  $\partial \mathbf{x}^\top / \partial \mathbf{y}$  and  $d\mathbf{x}^\top / d\mathbf{y}$  have  
876 fewer rows than columns and so are singular; hence, set-  
877 ting Eq. (M4) to zero implies that evolutionary equilibria  
878 can occur with persistent direct and total phenotypic se-  
879 lection in the brain model.

880 While we use Eqs. (M1) and (M2) to compute the evo-  
881 devo dynamics, those equations do not describe pheno-  
882 typic evolution as the climbing of an adaptive topogra-  
883 phy. To analyse phenotypic evolution as the climbing of  
884 an adaptive topography, we use the following. The evo-  
885 devo dynamics framework<sup>29</sup> shows that long-term phe-  
886 notypic evolution can be understood as the climbing of a  
887 fitness landscape by simultaneously following genotypic  
888 and phenotypic evolution, which for the brain model is  
889 given by

$$\frac{d\bar{\mathbf{z}}}{d\tau} = \mathbf{L}_z \frac{\partial w}{\partial \mathbf{z}}, \quad (\text{M5})$$

890 since  $\mathbf{z} = (\mathbf{x}; \mathbf{y})$  includes the phenotype  $\mathbf{x}$  and genotypic  
891 traits  $\mathbf{y}$ . The vector  $\partial w / \partial \mathbf{z}$  is the direct selection gra-  
892 dient of the geno-phenotype, measuring unconstrained  
893 selection on the phenotype and genotypic traits (as in  
894 Lande's<sup>37</sup> selection gradient). The matrix  $\mathbf{L}_z$  is the mech-  
895 anistic additive socio-genetic cross-covariance matrix of  
896 the geno-phenotype, for which the evo-devo dynamics  
897 framework provides formulas that guarantee that the de-  
898 velopmental constraint (M1) is met at all times (L for  
899 legacy). The matrix  $\mathbf{L}_z$  is asymmetric due to social devel-  
900 opment; if individuals face only ecological challenges, de-  
901 velopment is not social and  $\mathbf{L}_z$  reduces to  $\mathbf{H}_z$ , the mech-  
902 anistic additive genetic covariance matrix of the geno-  
903 phenotype, which is symmetric ( $\mathbf{H}_x$  is a mechanistic ver-  
904 sion of Lande's<sup>37</sup>  $\mathbf{G}$  matrix: whereas  $\mathbf{H}_x$  involves total  
905 derivatives describing the total effect of genotype on phe-  
906 notype,  $\mathbf{G}$  is defined in terms of regression of pheno-  
907 type on genotype; hence,  $\mathbf{H}_x$  and  $\mathbf{G}$  have different prop-  
908 erties including that mechanistic heritability can be greater  
909 than one). The matrix  $\mathbf{L}_z$  is always singular because it  
910 considers both the phenotype and genotypic traits, so  
911 selection and development jointly define the evolution-  
912 ary outcomes even with a single fitness peak<sup>31</sup>. Eq. (M5)  
913 and the formulas for  $\mathbf{L}_z$  entail that evolution proceeds as  
914 the climbing of the fitness landscape in geno-phenotype  
915 space, where the developmental constraint (M1) provides  
916 the admissible evolutionary path, such that evolution-  
917 ary outcomes occur at path peaks rather than landscape  
918 peaks if there are no absolute mutational constraints<sup>31</sup>.

919 We implement the developmental map of the brain  
920 model into the evo-devo dynamics framework to study  
921 the evolutionary dynamics of the resident phenotype  $\bar{\mathbf{x}}$ ,  
922 including the resident brain size  $\bar{x}_b$ .

923 **Six *Homo* scenarios.** It was previously found<sup>20</sup> that, at  
924 evolutionary equilibrium, the brain model recovers the  
925 evolution of the adult brain and body sizes of six *Homo*  
926 species. These six scenarios are given in Fig. 4. The  
927 scenarios yielding brain and body sizes of *H. sapiens*,  
928 *neardenthalensis*, and *heidelbergensis* scale use a weakly  
929 decelerating EEE: specifically, these scenarios use ex-  
930 ponential competence with parameter values given in

931 Regime 1 of Table S1 and with submultiplicative cooper-  
932 ation (Eq. S5). We call eco-social the scenario yielding  
933 brain and body sizes of *H. sapiens* scale; we call ecological  
934 the same scenario but setting the proportion of ecological  
935 challenges to one ( $P_1 = 1$ ). In turn, the scenarios yield-  
936 ing brain and body sizes of *erectus*, *ergaster*, and *habilis*  
937 scale use a strongly decelerating EEE: specifically, these  
938 scenarios use power competence with parameter values  
939 given in Regime 2 of Table S1 and with additive coopera-  
940 tion (Eq. S5). In the main text, we describe the evo-devo  
941 dynamics under the eco-social scenario that was previ-  
942 ously found<sup>20</sup> to yield *H. sapiens*-sized brains and bod-  
943 ies. For illustration, in the SI we also give the evo-devo  
944 dynamics of the ecological scenario (Fig. S3).

945 **Ancestral genotypic traits.** To solve the evo-devo dy-  
946 namics, we must specify the ancestral resident genotypic  
947 traits giving the resident growth efforts  $\bar{\mathbf{y}}$  at the initial evo-  
948 lutionary time. We find that the outcome depends on  
949 such ancestral conditions: for instance, there is bistabil-  
950 ity in brain size evolution, so there are at least two path  
951 peaks on the fitness landscape as follows. Using some-  
952 what "naive" ancestral growth efforts (SI section S4) in the  
953 eco-social scenario yields an evolutionary outcome with  
954 no brain, where residents have a somewhat semelparous  
955 life-history reproducing for a short period early in life  
956 followed by body shrinkage (Fig. S2). In contrast, using  
957 highly specified ancestral growth efforts in the eco-social  
958 scenario yields adult brain and body sizes of *H. sapiens*  
959 scale (Fig. 1). This bistability does not arise under the e-  
960 cological scenario which yields brain expansion under the  
961 same somewhat naive ancestral growth efforts (Fig. S3).  
962 Thus, for the the eco-social scenario to yield brain and  
963 body sizes of *H. sapiens* scale it requires ancestral condi-  
964 tions that already yield large brains, either with the highly  
965 specified conditions developmentally yielding australop-  
966 ithecine brain and body sizes (Fig. 1) or with the ecolo-  
967 gically optimal growth efforts that developmentally yield  
968 brain and body sizes approaching those of Neanderthals  
969 (Fig. S4). In the main text, we present the results for  
970 the eco-social scenario with the highly specified ances-  
971 tral conditions. This may be biologically interpreted as a  
972 requirement to evolve from ancestors that already had a  
973 genotype yielding some ontogenetic brain growth while  
974 having large brains at birth.

## 975 Acknowledgments

976 I thank A. Gardner, K. Laland, and R. Patchett for com-  
977 ments on previous versions of the manuscript. I thank  
978 A. Gardner for funding and S.D. Healy and C. Rutz for dis-  
979 cussion. A. Gardner suggested to randomly sample geno-  
980 typic traits to evaluate the resulting brain-body allometry  
981 as in Fig. 2b. This work was funded by an European Re-  
982 search Council Consolidator Grant to A. Gardner (grant  
983 no. 771387).

## References

- 984  
985  
986  
987  
988  
989  
990  
991  
992  
993  
994  
995  
996  
997  
998  
999  
1000  
1001  
1002  
1003  
1004  
1005  
1006  
1007  
1008  
1009  
1010  
1011  
1012  
1013  
1014  
1015  
1016  
1017  
1018  
1019  
1020  
1021  
1022  
1023  
1024  
1025  
1026  
1027  
1028  
1029  
1030  
1031  
1032  
1033
1. Klein, R. G. *The Human Career* (The Univ. of Chicago Press, 2009), 3rd edn.
2. Brown, P. *et al.* A new small-bodied hominin from the Late Pleistocene of Flores, Indonesia. *Nature* **431**, 1055–1061 (2004).
3. Garvin, H. M. *et al.* Body size, brain size, and sexual dimorphism in *Homo naledi* from the Dinaledi Chamber. *J. Hum. Evol.* **111**, 119–138 (2017).
4. Humphrey, N. K. The social function of the intellect. In Bateson, P. P. G. & Hinde, R. A. (eds.) *Growing Points in Ethology*, 303–317 (Cambridge Univ. Press, 1976).
5. Clutton-Brock, T. H. & Harvey, P. H. Primates, brains and ecology. *J. Zool.* **190**, 309–323 (1980).
6. Byrne, R. & Whiten, A. (eds.) *Machiavellian Intelligence* (Oxford Univ. Press, 1988).
7. Dunbar, R. I. M. The social brain hypothesis. *Evol. Anthropol.* **6**, 178–190 (1998).
8. Henrich, J. *The Secret of our Success* (Princeton Univ. Press, 2016).
9. Dunbar, R. I. M. & Shultz, S. Why are there so many explanations for primate brain evolution? *Phil. Trans. R. Soc. B* 20160244 (2017).
10. Laland, K. N. *Darwin's Unfinished Symphony* (Princeton Univ. Press, 2017).
11. Rosati, A. G. Foraging cognition: reviving the ecological intelligence hypothesis. *Trends Cogn Sci* **21**, 691–702 (2017).
12. DeCasien, A. R., Barton, R. A. & Higham, J. P. Understanding the human brain: insights from comparative biology. *Trends Cogn. Sci.* **26**, 432–445 (2022).
13. Hooper, R., Brett, B. & Thornton, A. Problems with using comparative analyses of avian brain size to test hypotheses of cognitive evolution. *PLoS ONE* **17**, e0270771 (2022).
14. Healy, S. D. *Adaptation and the Brain* (Oxford Univ. Press, Oxford, UK, 2021).
15. Will, M., Krapp, M., Stock, J. T. & Manica, A. Different environmental variables predict body size and brain size evolution in *Homo*. *Nat. Comm.* **12**, 4116 (2021).
16. Gavrilets, S. & Vose, A. The dynamics of Machiavellian intelligence. *Proc. Natl. Acad. Sci. USA* **103**, 16823–16828 (2006).
17. dos Santos, M. & West, S. A. The coevolution of cooperation and cognition in humans. *Proc. R. Soc. B* **285**, 20180723 (2018).
18. Muthukrishna, M., Doebeli, M., Chudek, M. & Henrich, J. The cultural brain hypothesis: how culture drives brain expansion, sociality, and life history. *PLOS Comp. Biol.* **14**, e1006504 (2018).
19. González-Forero, M., Faulwasser, T. & Lehmann, L. A model for brain life history evolution. *PLOS Comp. Biol.* **13**, e1005380 (2017).
20. González-Forero, M. & Gardner, A. Inference of ecological and social drivers of human brain-size evolution. *Nature* **557**, 554–557 (2018).
21. West, G. B., Brown, J. H. & Enquist, B. J. A general model for ontogenetic growth. *Nature* **413**, 628–631 (2001).
22. Aiello, L. C. & Wheeler, P. The expensive-tissue hypothesis. *Curr. Anthropol.* **36**, 199–221 (1995).
23. Kuzawa, C. W. *et al.* Metabolic costs and evolutionary implications of human brain development. *Proc. Nat. Acad. Sci. USA* **111**, 13010–13015 (2014).
24. Schaffer, W. M. The application of optimal control theory to the general life history problem. *Am. Nat.* **121**, 418–431 (1983).
25. Sydsæter, K., Hammond, P., Seierstad, A. & Strom, A. *Further Mathematics for Economic Analysis* (Prentice Hall, 2008), 2nd edn.
26. Kamien, M. I. & Schwartz, N. L. *Dynamic Optimization* (Dover, Mineola, NY, 2012), 2nd edn.
27. Dieckmann, U., Heino, M. & Parvinen, K. The adaptive dynamics of function-valued traits. *J. Theor. Biol.* **241**, 370–389 (2006).
28. Parvinen, K., Heino, M. & Dieckmann, U. Function-valued adaptive dynamics and optimal control theory. *J. Math. Biol.* **67**, 509–533 (2013).
29. González-Forero, M. A mathematical framework for evo-devo dynamics (2022). In review at *Theor. Popul. Biol.* Preprint: <https://www.biorxiv.org/content/10.1101/2021.05.17.441065>.
30. Wright, T. L. & Pierson, T. C. *Living with Volcanoes* (U. S. Geological Survey Circular 1073, Denver, CO, USA, 1992).
31. González-Forero, M. How development affects evolution. *Evolution* **77**, 562–579 (2023).
32. Dekaban, A. S. & Sadowsky, D. Changes in brain weights during the span of human life: Relation of brain weights to body heights and body weights. *Ann. Neurol.* **4**, 345–356 (1978).
33. Bogin, B. *Patterns of Human Growth* (Cambridge Univ. Press, Cambridge, UK, 1988).
34. Gluckman, P. D. & Hanson, M. A. Evolution, development and timing of puberty. *Trends Endocrinol. Metab.* **17**, 7–12 (2006).
35. Leigh, S. R. Brain growth, life history, and cognition in primate and human evolution. *Am. J. Primatol.* **62**, 139–164 (2004).
- 1034  
1035  
1036  
1037  
1038  
1039  
1040  
1041  
1042  
1043  
1044  
1045  
1046  
1047  
1048  
1049  
1050  
1051  
1052  
1053  
1054  
1055  
1056  
1057  
1058  
1059  
1060  
1061  
1062  
1063  
1064  
1065  
1066  
1067  
1068  
1069  
1070  
1071  
1072  
1073  
1074  
1075  
1076  
1077  
1078  
1079  
1080  
1081  
1082

- 1083 36. Pontzer, H. *et al.* Daily energy expenditure through  
1084 the human life course. *Science* **373**, 808–812 (2021).
- 1085 37. Lande, R. Quantitative genetic analysis of multivari-  
1086 ate evolution applied to brain: body size allometry.  
1087 *Evolution* **34**, 402–416 (1979).
- 1088 38. Kirkpatrick, M. & Lofsvold, D. Measuring selection  
1089 and constraint in the evolution of growth. *Evolution*  
1090 **46**, 954–971 (1992).
- 1091 39. Bogin, B. & Smith, B. H. Evolution of the human life  
1092 cycle. *Am. J. Hum. Biol.* **8**, 703–716 (1996).
- 1093 40. Robson, S. L. & Wood, B. Hominin life history: recon-  
1094 struction and evolution. *J. Anat.* **212**, 394–425 (2008).
- 1095 41. Jones, J. H. Primates and the evolution of long, slow  
1096 life histories. *Curr. Biol.* **21**, R708–R717 (2011).
- 1097 42. Leigh, S. R. Evolution of human growth. *Evol. Anthro-  
1098 pol.* **10**, 223–236 (2001).
- 1099 43. Tanner, J. M., Whitehouse, R. H. & Takaishi, M. Stan-  
1100 dards from birth to maturity for height, weight, height  
1101 velocity, and weight velocity: British children, 1965.  
1102 *Arch. Dis. Childh.* **41**, 454–471 (1966).
- 1103 44. Cameron, N. & Schell, L. M. (eds.) *Human Growth and  
1104 Development* (Academic Press, London, UK, 2022),  
1105 3rd edn.
- 1106 45. Gasser, T. *et al.* An analysis of the mid-growth and  
1107 adolescent growth spurts of height based on acceler-  
1108 ation. *Ann. Hum. Biol.* **12**, 129–148 (1985).
- 1109 46. Hauspie, R. C. & Molinari, L. Parametric models for  
1110 postnatal growth. In Hauspie, R. C., Cameron, N.  
1111 & Molinari, L. (eds.) *Methods in Human Growth Re-  
1112 search*, 205–233 (Cambridge Univ. Press, Cambridge,  
1113 UK, 2004).
- 1114 47. Johnson, W. Modeling growth curves for epidemiol-  
1115 ogy. In Cameron, N. & Schell, L. M. (eds.) *Human  
1116 Growth and Development*, chap. 13, 371–390 (Aca-  
1117 demic Press, London, UK, 2022).
- 1118 48. Gasser, T. *et al.* Human height growth: correlational  
1119 and multivariate structure of velocity and accelera-  
1120 tion. *Ann. Hum. Biol.* **12**, 501–515 (1985).
- 1121 49. Count, E. W. Growth patterns of the human physique:  
1122 an approach to kinetic anthropometry. *Hum. Biol.* **15**,  
1123 1–32 (1943).
- 1124 50. Spear, L. *The Behavioral Neuroscience of Adolescence*  
1125 (W. W. Norton & Company, New York, NY, USA, 2010).
- 1126 51. Tanner, J. M. The regulation of human growth. *Child  
1127 Dev.* **34**, 817–847 (1963).
- 1128 52. Bogin, B. Catastrophe theory model for the regulation  
1129 of human growth. *Hum. Biol.* **52**, 215–227 (1980).
- 1130 53. Howarth, C., Peppiatt-Wildman, C. M. & Attwell, D.  
1131 The energy use associated with neural computation  
1132 in the cerebellum. *J. Cereb. Blood Flow Metab.* **30**,  
1133 403–414 (2010).
54. Jerison, H. J. *Evolution of the Brain and Intelligence*  
(Academic Press, 1973). 1134 1135
55. Martin, R. D. Relative brain size and basal metabolic  
rate in terrestrial vertebrates. *Nature* **293**, 57–60  
(1981). 1136 1137 1138
56. Wilson, L. A. B. *et al.* Sex differences in allometry  
for phenotypic traits in mice indicate that females are  
not scaled males. *Nat. Comm.* **13**, 7502 (2022). 1139 1140 1141
57. Smaers, J. B. *et al.* The evolution of mammalian brain  
size. *Sci. Adv.* **7**, eabe2101 (2021). 1142 1143
58. Grabowski, M., Hatala, K. G., Jungers, W. L. & Rich-  
mond, B. G. Body mass estimates of homininfossils  
and the evolution of human body size. *J. Hum. Evol.*  
**85**, 75–93 (2015). 1144 1145 1146 1147
59. Kappelman, J. The evolution of body mass and rela-  
tive brain size in fossil hominids. *J. Hum. Evol.* **30**,  
243–276 (1996). 1148 1149 1150
60. Pilbeam, D. & Gould, S. J. Size and scaling in human  
evolution. *Science* **186**, 892–901 (1974). 1151 1152
61. Waddington, C. H. Canalization of development and  
the inheritance of acquired characters. *Nature* **150**,  
563–565 (1942). 1153 1154 1155
62. Pélabon, C. *et al.* Evolution of morphological allome-  
try. *Ann. N. Y. Acad. Sci.* **1320**, 58–75 (2014). 1156 1157
63. Hansen, T. F. & Houle, D. Measuring and comparing  
evolvability and constraint in multivariate characters.  
*J. Evol. Biol.* **21**, 1201–1219 (2008). 1158 1159 1160
64. Walsh, B. & Lynch, M. *Evolution and Selection of  
Quantitative Traits* (Oxford Univ. Press, Oxford, UK,  
2018). 1161 1162 1163
65. Froehle, A. W. & Churchill, S. E. Energetic competi-  
tion between Neandertals and anatomically modern  
humans. *PaleoAnthropology* 96–116 (2009). 1164 1165 1166
66. Ruff, C. B., Trinkaus, E. & Holliday, T. W. Body mass  
and encephalization in Pleistocene *Homo*. *Nature*  
**387**, 173–176 (1997). 1167 1168 1169
67. Rightmire, G. P. Brain size and encephalization in  
early to mid-pleistocene *Homo*. *Am. J. Phys. Anthro-  
pol.* **124**, 109–123 (2004). 1170 1171 1172
68. McHenry, H. M. Tempo and mode in human evolu-  
tion. *Proc. Natl. Acad. Sci. USA* **91**, 6780–6786 (1994). 1173 1174
69. McHenry, H. M. & Coffing, K. *Australopithecus to  
Homo: transformations in body and mind. Annu. Rev.  
Anthropol.* **29**, 125–146 (2000). 1175 1176 1177
70. Morrissey, M. B. Selection and evolution of causally  
covarying traits. *Evolution* **68**, 1748–1761 (2014). 1178 1179
71. Hawks, J., Hunley, K., Lee, S.-H. & Wolpoff, M. Popu-  
lation bottlenecks and pleistocene human evolution.  
*Mol. Biol. Evol.* **17**, 2–22 (2000). 1180 1181 1182

- 1183 72. Hamilton, W. D. The moulding of senescence by nat- Afd. Natuurk. Eerste Reeks, Amsterdam, Netherlands, 1234  
1184 ural selection. *J. Theor. Biol.* **12**, 12–45 (1966). 1235
- 1185 73. Maynard Smith, J. *et al.* Developmental constraints and evolution. *Q. Rev. Biol.* **60**, 265–287 (1985). 1236
- 1186 89. Broekmans, F. J., Faddy, M. J., Scheffer, G. & te Velde, E. R. Antral follicle counts are related to age at natural 1237  
1187 74. Beldade, P., Koops, K. & Brakefield, P. M. Develop- fertility loss and age at menopause. *Menopause* **11**, 1238  
1188 mental constraints versus flexibility in morphological 607–614 (2004). 1239  
1189 evolution. *Nature* **416**, 844–847 (2002). 90. Kleiber, M. *The Fire of Life* (Wiley, 1961). 1240
- 1190 75. Montgomery, S. H., Mundy, N. I. & Barton, R. A. Brain 1241  
1191 evolution and development: adaptation, allometry 1242  
1192 and constraint. *Proc. R. Soc. B* **283**, 20160433 (2016). 1243
- 1193 76. Gould, S. J. *The Structure of Evolutionary Theory* 1244  
1194 (Belknap Press, Cambridge, MA, USA, 2002). 1245
- 1195 77. Laland, K. N. *et al.* The extended evolutionary synthe- 1246  
1196 sis: its structure, assumptions and predictions. *Proc.* 1247  
1197 *R. Soc. B* **282**, 20151019 (2015). 1248
- 1198 78. Grabowski, M. Bigger brains led to bigger bodies?: the 1249  
1199 correlated evolution of human brain and body size. 1250  
1200 *Curr. Anthropol.* **57**, 174–185 (2016). 1251
- 1201 79. Uller, T., Moczek, A. P., Watson, R. A., Brakefield, P. M. 1252  
1202 & Laland, K. N. Developmental bias and evolution: 1253  
1203 A regulatory network perspective. *Genetics* **209**, 949– 1254  
1204 966 (2018). 1255
- 1205 80. Suárez, R. & Halley, A. C. Evolution of developmen- 1256  
1206 tal timing as a driving force of brain diversity. *Brain* 1257  
1207 *Behav. Evol.* **97**, 3–7 (2022). 1258
- 1208 81. Finlay, B. L. The multiple contexts of brain scaling: 1259  
1209 phenotypic integration in brain and behavioral evo- 1260  
1210 lution. *Brain Behav. Evol.* **97**, 83–95 (2022). 1261
- 1211 82. Fenlon, L. R. Timing as a mechanism of development 1262  
1212 and evolution in the cerebral cortex. *Brain Behav.* 1263  
1213 *Evol.* **97**, 8–32 (2022). 1264
- 1214 83. Mann, A. E. Hominid and cultural origins. *Man* **7**, 1265  
1215 379–386 (1975). 1266
- 1216 84. Rosenberg, K. R. The evolution of human infancy: 1267  
1217 why it helps to be helpless. *Ann. Rev. Anthropol.* **50**, 1268  
1218 423–440 (2021). 1269
- 1219 85. Navarrete, A., van Schaik, C. P. & Isler, K. Energetics 1270  
1220 and the evolution of human brain size. *Nature* **480**, 1271  
1221 91–93 (2011). 1272
- 1222 86. Cranmer, K., Brehmer, J. & Louppe, G. The frontier 1273  
1223 of simulation-based inference. *Proc. Natl. Acad. Sci.* 1274  
1224 *USA* **117**, 30055–30062 (2020). 1275
- 1225 87. Dieckmann, U. & Law, R. The dynamical theory of 1276  
1226 coevolution: a derivation from stochastic ecological 1277  
1227 processes. *J. Math. Biol.* **34**, 579–612 (1996). 1278
- 1228 88. Metz, J., Geritz, S., Meszéna, G., Jacobs, F. & van 1279  
1229 Heerwaarden, J. Adaptive dynamics, a geometri- 1280  
1230 cal study of the consequences of nearly faithful re- 1281  
1231 production. In van Strien, S. & Lunel, S. V. (eds.) 1282  
1232 *Stochastic and spatial structures of dynamical sys-* 1283  
1233 *tems*, 183–231 (Konink. Nederl. Akad. Wetensch. Verh. 1284
